# Supplementary material for: Achieving Ferromagnetism in Single-Crystalline Bismuth Ferrite Nanoparticles through Jet Milling
Source: Research Square preprint supplement (doi:10.21203/rs.3.rs-6470902/v1), 2025-05-05
Supplement: Supplementary file 1 [file 9a8b5c6f38149df1c66a8aae.docx]

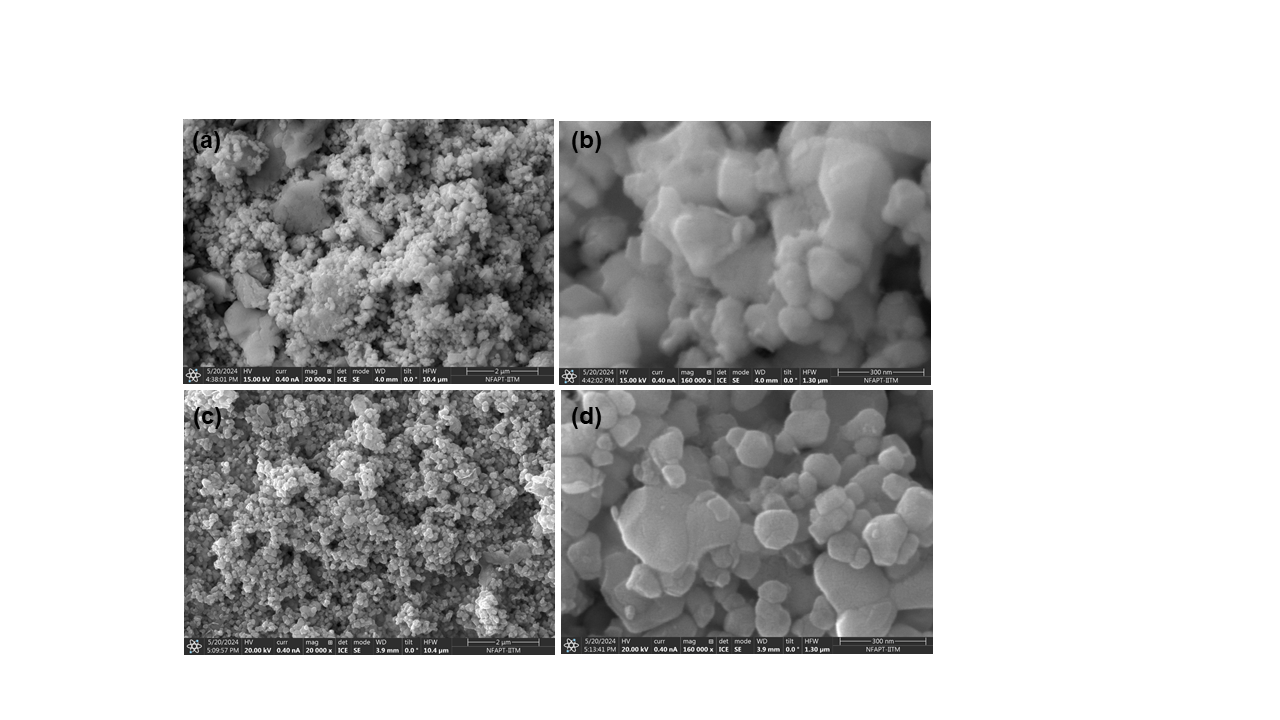


Figure S1: The FESEM images of the jet milled at (a-b) 2 bar pressure and (c-d) 6 bar pressure.

The FESEM images of the BFO nanoparticles at 2 bar and 6 bar pressure are shown in figure S1.
